# Supplementary material for: Nano-Montmorillonite Regulated Crystallization of Hierarchical Strontium Carbonate in a Microbial Mineralization System
Source: Materials (Basel). 2019 Apr 29;12(9):1392. doi: 10.3390/ma12091392 (PMC6539429; doi:10.3390/ma12091392)
Supplement: Supplementary file 1 [file materials-12-01392-s001.pdf]

# Nano-montmorillonite Regulated Crystallization of Hierarchical Strontium Carbonate in a Microbial Mineralization System

Kui Zheng<sup>1,#</sup>, Tao Chen<sup>2,3,#</sup>, Jian Zhang<sup>2,3,#</sup>, Xiuquan Tian<sup>2</sup>, Huilin Ge<sup>2</sup>, Tiantao Qiao<sup>2</sup>, Jia Lei<sup>2,3</sup>, Xianyan Li<sup>2</sup>, Tao Duan<sup>2,3</sup> and Wenkun Zhu<sup>2,3,\*</sup>

<sup>1</sup> Analytical and Testing Center, Southwest University of Science and Technology, Mianyang 621010, China; zhengkui@swust.edu.cn

<sup>2</sup> State Key Laboratory of Environmentally Friendly Energy Materials, Southwest University of Science and Technology, Mianyang 621010, China; chentao314710@163.com (T.C.); z2358727542@163.com (J.Z.); tian1993tian1993@163.com (X.T.); gehuilin1998@163.com (H.G.); 1805338097@qq.com (T.Q.); cutiancheng@163.com (J.L.); lxying@swust.edu.cn (X.L.); duant@ustc.edu.cn (T.D.)

<sup>3</sup> Nuclear Waste and Environmental Safety Key Laboratory of Defense, National Collaborative Innovation Center for Nuclear Waste and Environmental Safety, Southwest University of Science and Technology, Mianyang 621010, China

\* Correspondence: zhuwenkun@swust.edu.cn; Tel.: +86-816-608-9883

# These authors contributed equally.

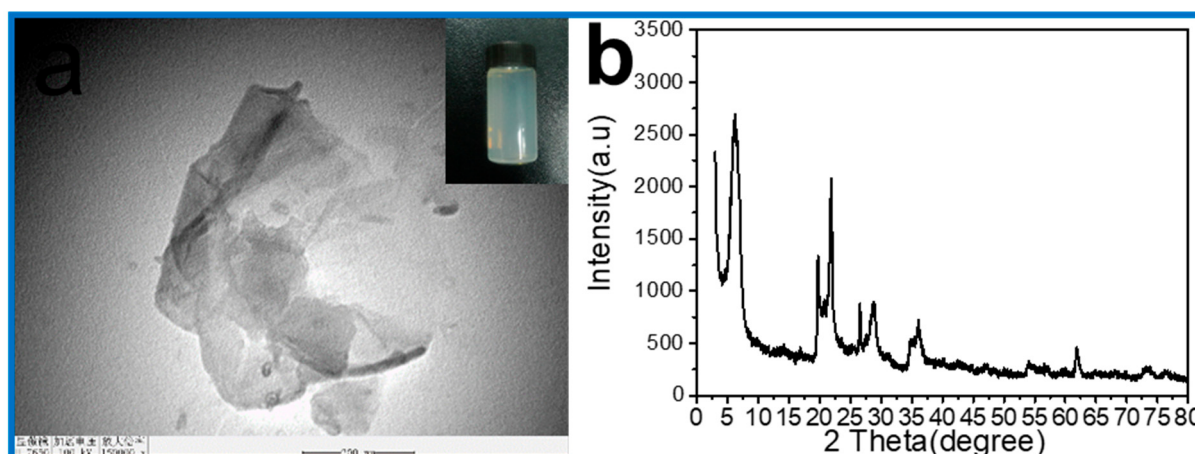

**Figure S1.** (a) TEM images of nano-MMT, where the inset shows pictures of nano-MMT suspension, (b) XRD patterns of nano-MMT.

The colony of *Bacillus pasteurii* on LB agar medium is characterized by smooth colonies, homogeneous edges, clear, elevated, viscous, see Figure S2a. *Bacillus pasteurii* is a spherical bacterium with a smooth surface and a size of 0.8–1.5  $\mu\text{m}$ , see Figure S2b. The morphology of *Bacillus pasteurii* is distinctly different from that of calcite rods.

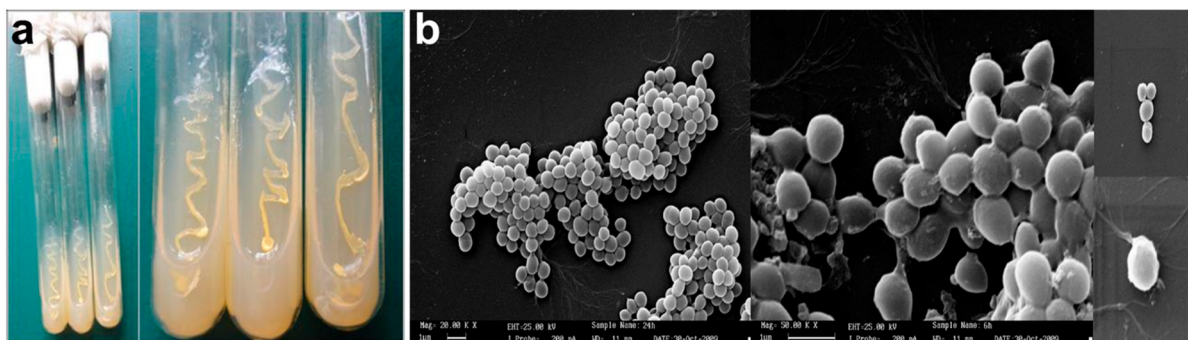

**Figure S2.** (a) *Bacillus pasteurii* colony, (b) SEM of *bacillus pasteurii* mycelium.

In the process of microbial mineralization of calcium carbonate, microorganisms play two core roles: One is to provide urease for urea hydrolysis, and the other is to provide crystal nuclei for the formation of calcium carbonate crystals [1,2,4,5]

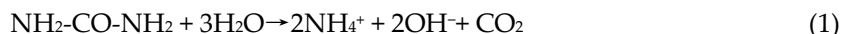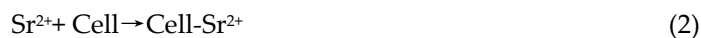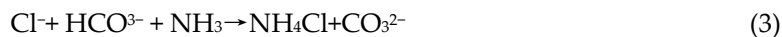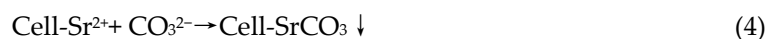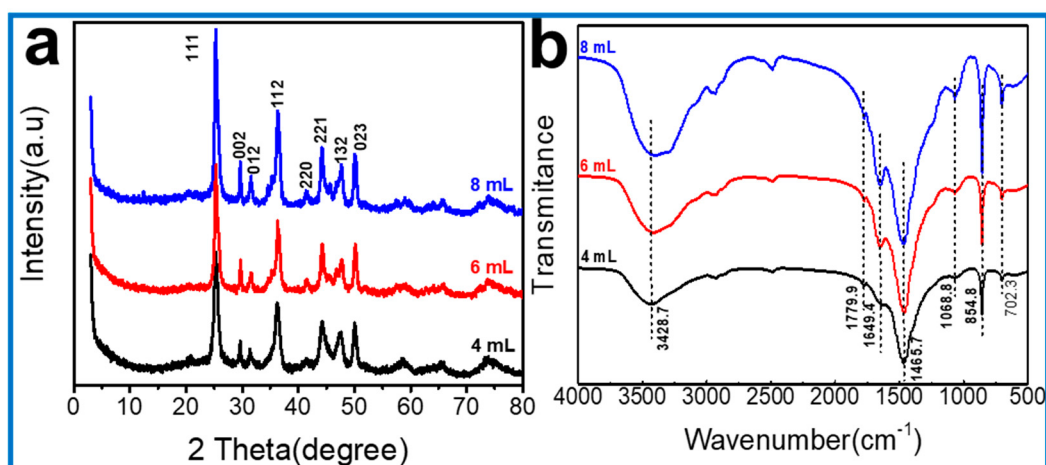

**Figure S3.** (a) XRD patterns and (b) FT-IR spectrum of strontium carbonate obtained using varying amounts of nano-MMT.

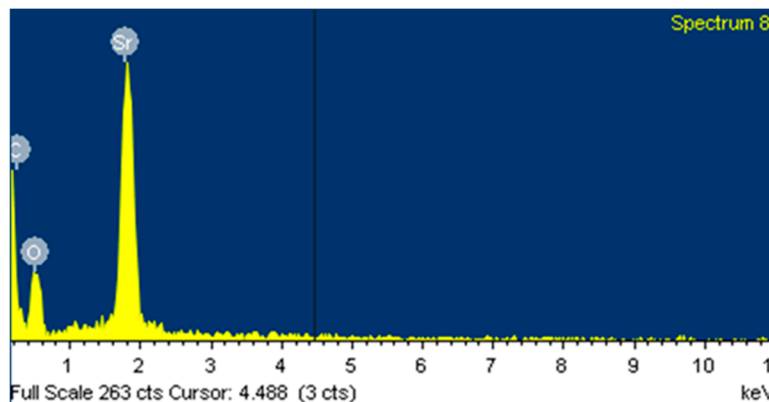

**Figure S4.** EDS spectrum of strontium carbonate.

Figure S5 shows the TGA data of strontium carbonate. The entire decomposition process was accompanied by three weight loss stages [3,6]. Weight lost slowly should be caused by the loss of water under 290 °C. Notable weight loss appeared in the curve during 313.5–776.3 °C, which should be caused by thermal decomposition of bacteria metabolite in the mineralized samples. The mineralized samples in the presence of nano-MMT have a weight loss rate of 5.0%, the mineralized samples in the absence of nano-MMT have a weight loss rate of 3.9%. Evidently, the weight loss rate of the mineralized samples in the presence of nano-MMT was 1.1% greater than the weight loss rate of the mineralized samples in the absence of nano-MMT, which should be attributed to the pyrolysis of nano-MMT in mineralized samples. Large thermal decomposition occurs at 776.3–985.6 °C, which can be attributed to the decomposition of strontium carbonate. From the analysis above, it is safe to conclude that the nano-MMT was involved in the crystallization process of strontium carbonate.

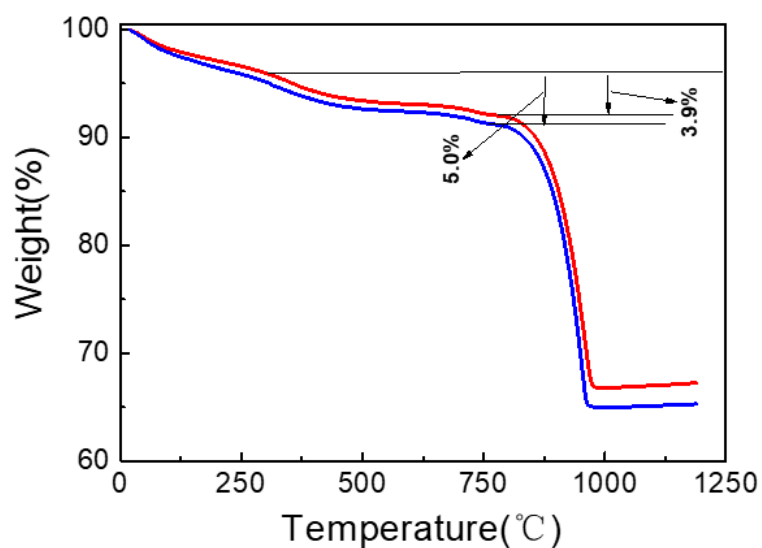

**Figure S5.** TGA spectra of mineralized samples in the absence of additives and the presence of nano-MMT, respectively.

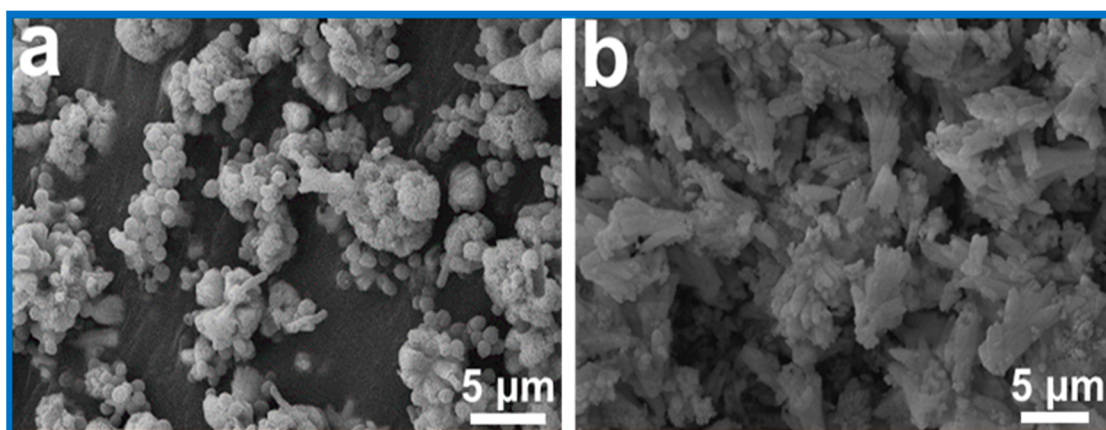

**Figure S6.** Typical SEM images of SrCO<sub>3</sub> were obtained by chemical method. (a) SrCO<sub>3</sub> were obtained in the water, (b) mineralized samples were obtained in the presence of Nano-MMT.

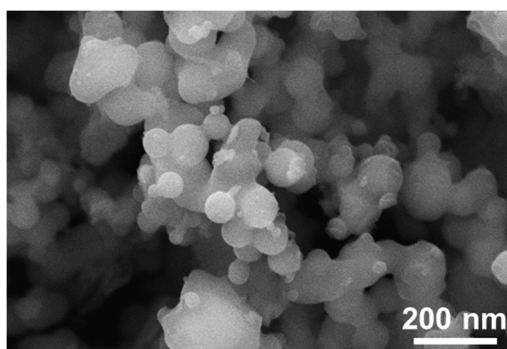

**Figure S7.** SEM of amorphous SrCO<sub>3</sub> precursor in the early stage of microbial mineralization.

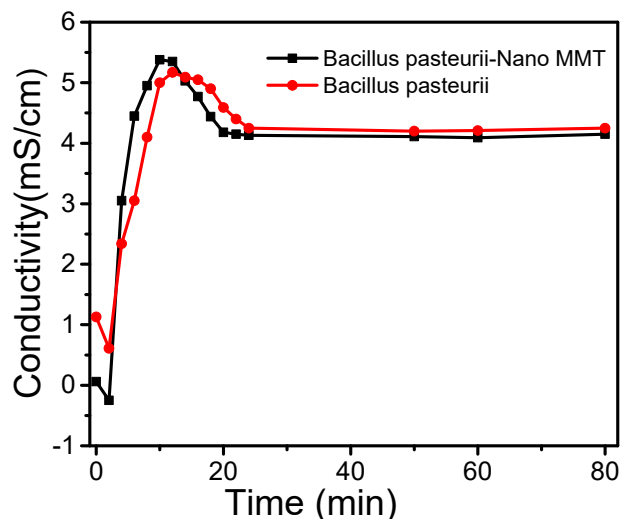

**Figure S8.** Relationship of conductivity with time in different mineralized solutions.

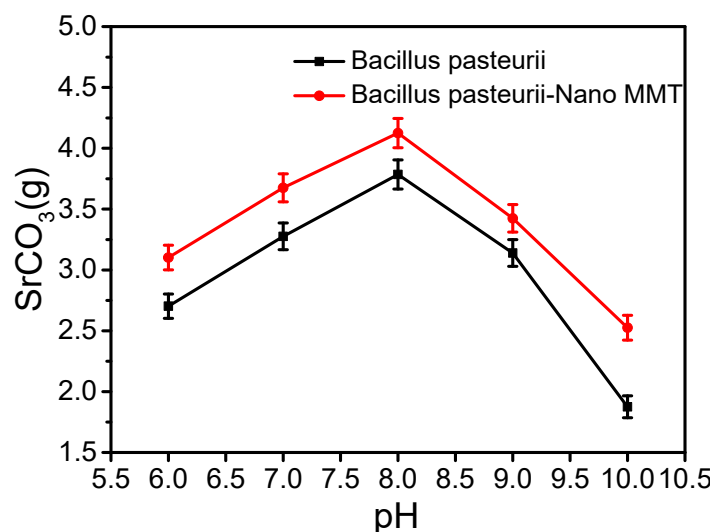

**Figure S9.** The effect of pH values on the yield of SrCO<sub>3</sub>.

## References

1. Dejong, J.T.; Fritzges, M.B.; Nüsslein, K. Microbially Induced Cementation to Control Sand Response to Undrained Shear. *J. Geotech. Geoenviron. Eng.* **2006**, *132*, 1381–1392.
2. Muynck, W.D.; Belie, N.D.; Verstraete, W.; Jonkers, H.M.; Loosdrecht, M.C.M.V. Microbial carbonate precipitation in construction materials: A review. *Ecolog. Eng.* **2010**, *36*, 118–136.
3. Chen, T.; Li, J.; Shi, P.; Li, Y.; Lei, J.; Zhou, J.; Hu, Z.; Duan, T.; Tang, Y.; Zhu, W. Effects of Montmorillonite on the Mineralization and Cementing Properties of Microbiologically Induced Calcium Carbonate. *Adv. Mater. Sci. Eng.* **2017**, *2017*, 1–13.
4. Chen, T.; Shi, P.; Li, Y.; Zhang, J.; Duan, T.; Yu, Y.; Zhou, J.; Zhu, W. Crystallization of calcium carbonate mineral with hierarchical structures regulated by silk fibroin in microbial mineralization system. *J. Cryst. Growth*, **2018**, *493*, 51–57.
5. Chen, T.; Shi, P.H.; Li, Y.; Duan, T.; Yu, Y.; Li, X.; Zhu, W. Biomineralization of Varied Calcium Carbonate Crystal by Synergistic Effect of Silk Fibroin/Magnesium ions in a Microbial System. *Crystengcomm* **2018**, *20*, 2366–2373.
6. Liu, L.; Zhang, X.; Liu, X.; Liu, J.; Lu, G.; Kaplan, D.L.; Zhu, H.; Lu, Q. Biomineralization of stable and monodisperse vaterite microspheres using silk nanoparticles. *Acs Appl. Mater. Interfaces* **2015**, *7*, 1735–1745.
